# Supplementary material for: Prediction of two-dimensional C3N2 semiconductors with outstanding stability, moderate band gaps, and high carrier mobility
Source: Royal Society of Chemistry journal article supplement (doi:10.1039/d4dt01369g), 2024-01-01
Supplement: d4dt01369g1.pdf [file d4dt01369g1.pdf]

## Supporting Information

### Prediction of two-dimensional $C_3N_2$ semiconductors with outstanding stability, moderate band gaps, and high carrier mobility

Longhui Li,<sup>a</sup> Rui Tan,<sup>\*a</sup> Yulou Ouyang,<sup>a</sup> Xiaolin Wei,<sup>a</sup> and Zhenkun Tang<sup>\*a</sup>

<sup>a</sup> Key Laboratory of Micro-nano Energy Materials and Application Technologies,  
University of Hunan Province & College of Physics and Electronics Engineering,  
Hengyang Normal University, Hengyang 421002, China.

E-mail: rtan@hynu.edu.cn, zktang@hynu.edu.cn

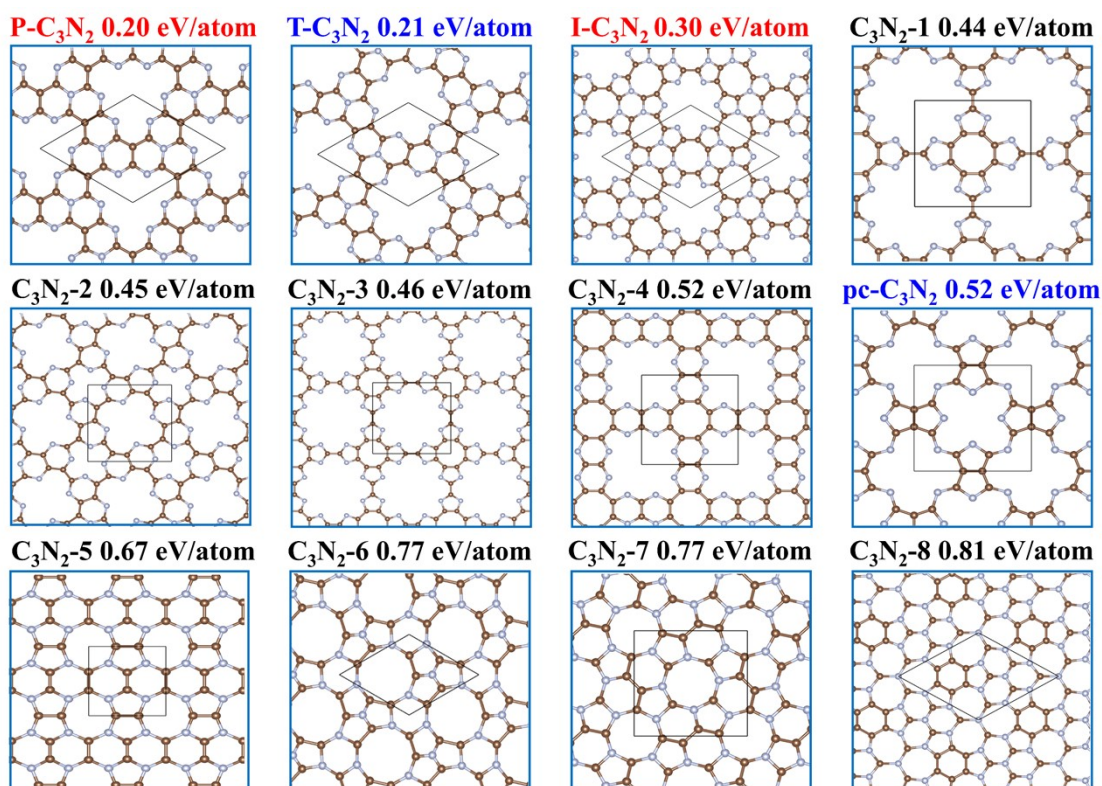

**Fig. S1** The 12 reasonable  $C_3N_2$  structures predicted by the RG<sup>2</sup> code, along with their calculated formation energies.

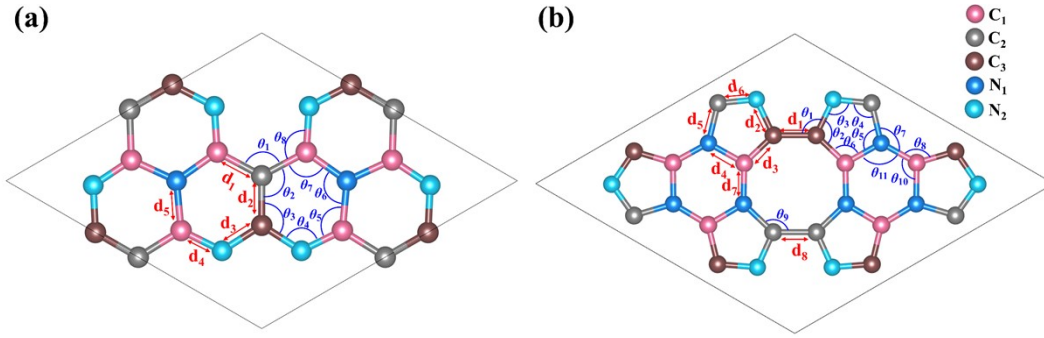

**Fig. S2** The unit cells of (a) P-C<sub>3</sub>N<sub>2</sub> and (b) I-C<sub>3</sub>N<sub>2</sub> monolayers with inequivalent C and N atoms.

**Table S1** The bond lengths and bond angles of P-C<sub>3</sub>N<sub>2</sub>.

| Material                        | Bonds | Bond lengths (Å) | Bond angles | Angles (°) |
|---------------------------------|-------|------------------|-------------|------------|
| P-C <sub>3</sub> N <sub>2</sub> | $d_1$ | 1.45             | $\theta_1$  | 123.9      |
|                                 | $d_2$ | 1.41             | $\theta_2$  | 118.1      |
|                                 | $d_3$ | 1.35             | $\theta_3$  | 122.7      |
|                                 | $d_4$ | 1.31             | $\theta_4$  | 121        |
|                                 | $d_5$ | 1.43             | $\theta_5$  | 121.5      |
|                                 |       |                  | $\theta_6$  | 120        |
|                                 |       |                  | $\theta_7$  | 116.7      |
|                                 |       |                  | $\theta_8$  | 121.8      |

**Table S2** The bond lengths and bond angles of I-C<sub>3</sub>N<sub>2</sub>.

| Material                        | Bonds | Bond lengths (Å) | Bond angles   | Angles (°) |
|---------------------------------|-------|------------------|---------------|------------|
| I-C <sub>3</sub> N <sub>2</sub> | $d_1$ | 1.46             | $\theta_1$    | 115.7      |
|                                 | $d_2$ | 1.36             | $\theta_2$    | 107.9      |
|                                 | $d_3$ | 1.39             | $\theta_3$    | 110.1      |
|                                 | $d_4$ | 1.41             | $\theta_4$    | 109.1      |
|                                 | $d_5$ | 1.41             | $\theta_5$    | 105.8      |
|                                 | $d_6$ | 1.32             | $\theta_6$    | 107.1      |
|                                 | $d_7$ | 1.39             | $\theta_7$    | 132.5      |
|                                 | $d_8$ | 1.48             | $\theta_8$    | 134.6      |
|                                 |       |                  | $\theta_9$    | 136.5      |
|                                 |       |                  | $\theta_{10}$ | 118.3      |
|                                 |       |                  | $\theta_{11}$ | 121.7      |

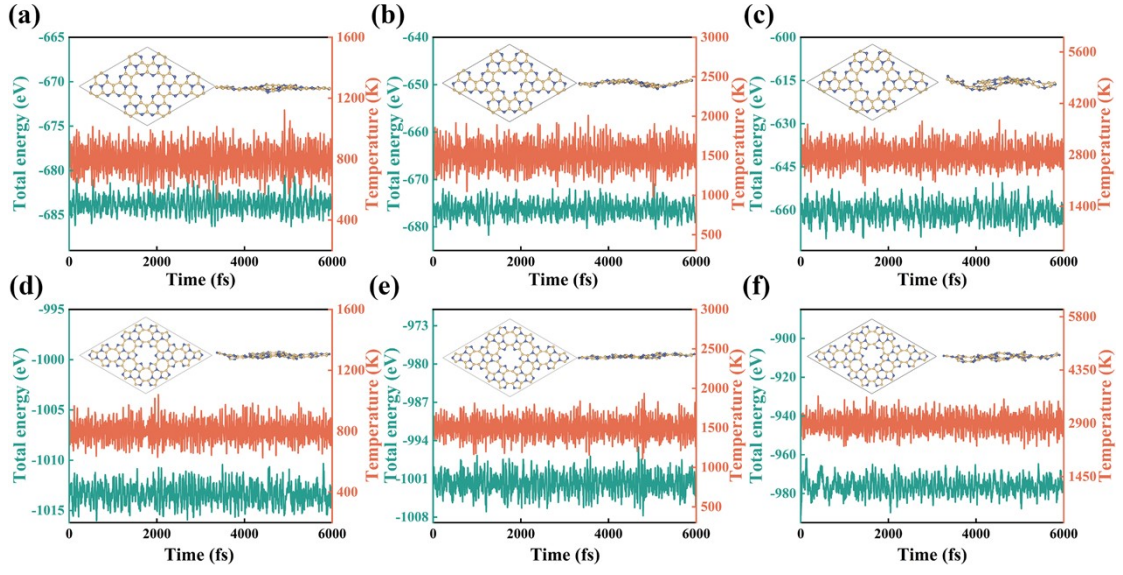

**Fig. S3** (a-c) AIMD simulations of a  $2 \times 2$  P-C<sub>3</sub>N<sub>2</sub> supercell at 800,1500 and 2800 K. (d-f) AIMD simulations of a  $2 \times 2$  I-C<sub>3</sub>N<sub>2</sub> supercell at 800,1500 and 2900 K.

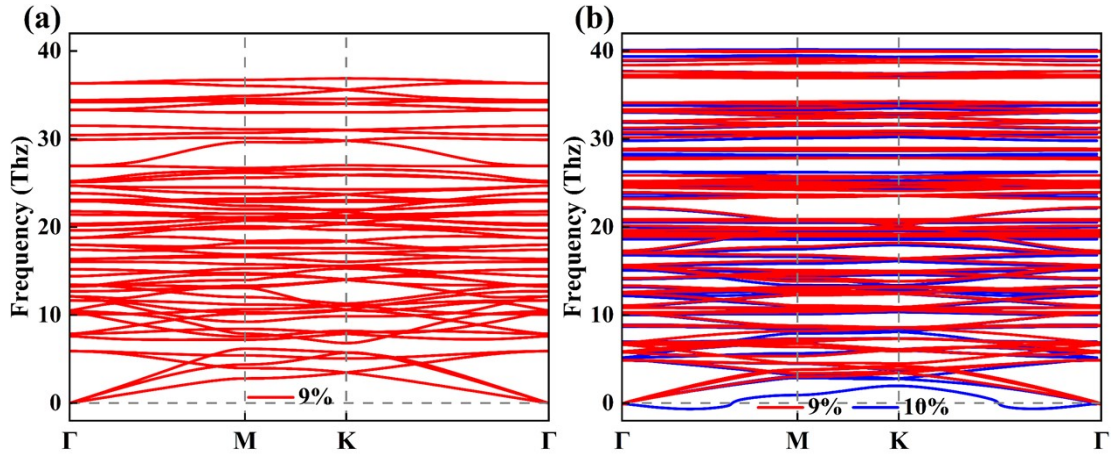

**Fig. S4** (a) Phonon spectrum of P-C<sub>3</sub>N<sub>2</sub> under 9% biaxial ultimate strain. (b) Phonon spectra of I-C<sub>3</sub>N<sub>2</sub> under 9% and 10% biaxial strain.

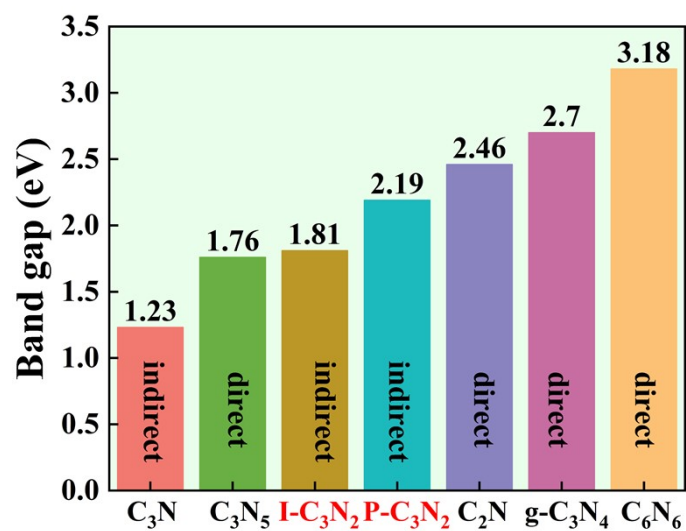

**Fig. S5** Comparison of band gaps between two  $C_3N_2$  monolayers and synthesized 2D carbon nitride materials.

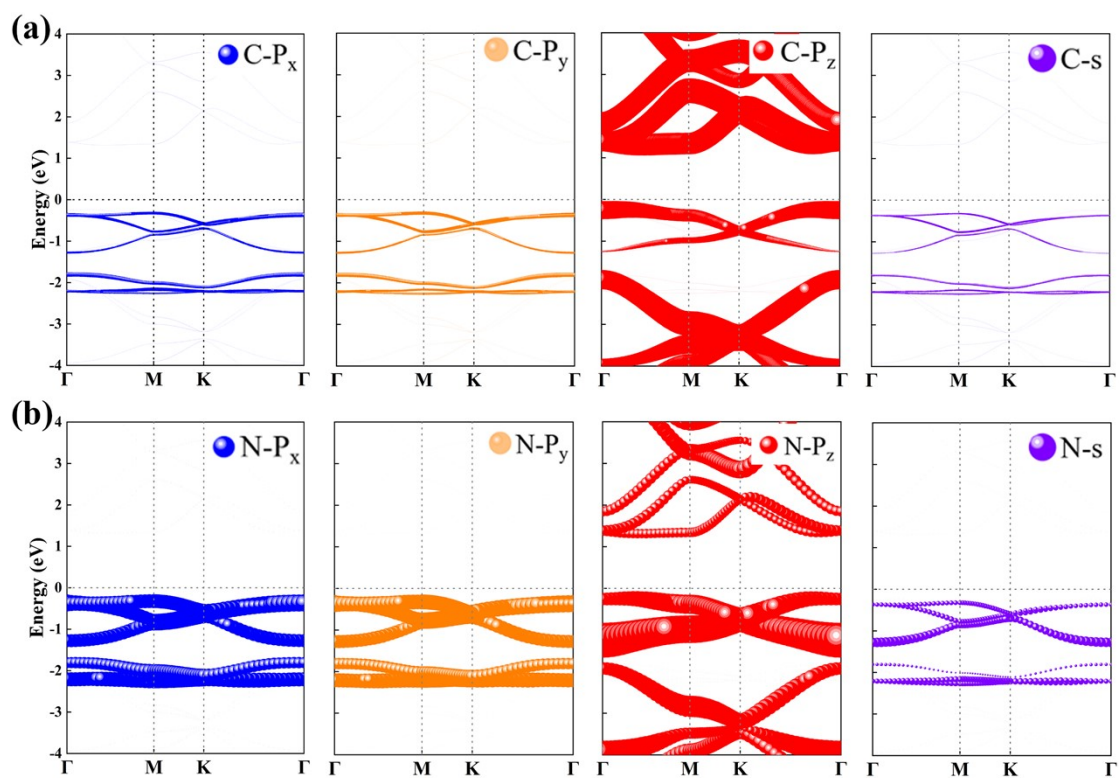

**Fig. S6** The orbital-projected band structure of the  $P-C_3N_2$  monolayer.



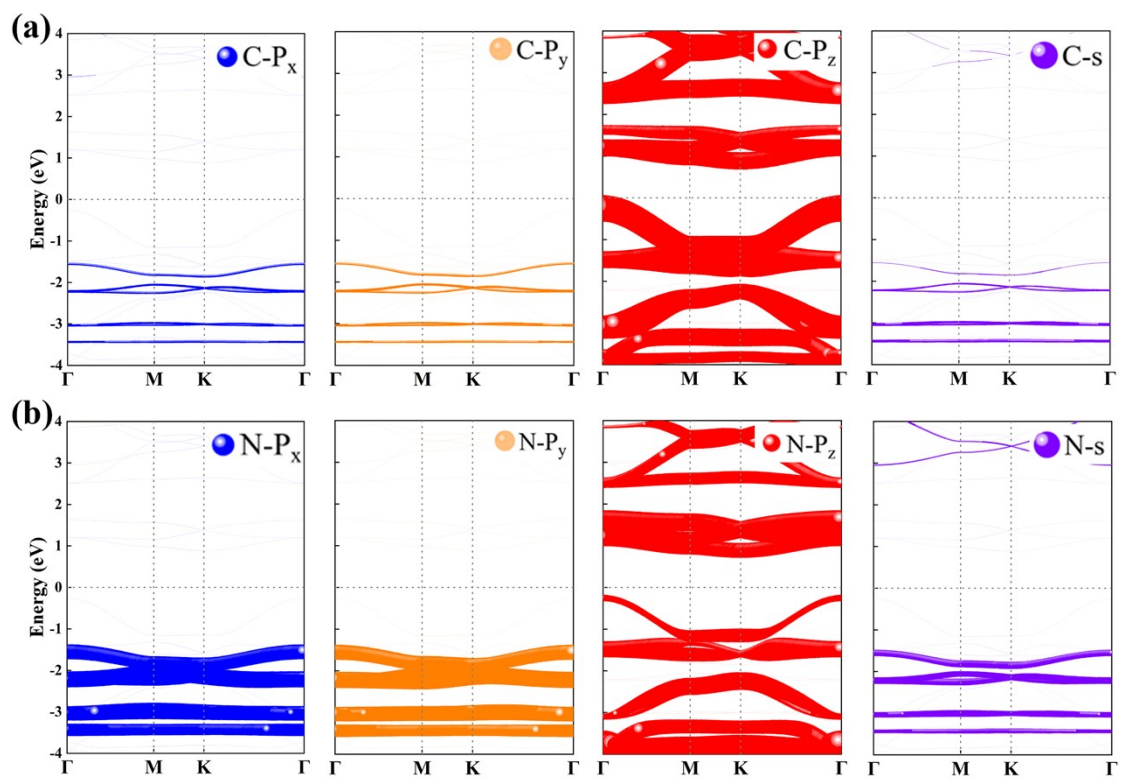

**Fig. S7** The orbital-projected band structure of the I-C<sub>3</sub>N<sub>2</sub> monolayer.

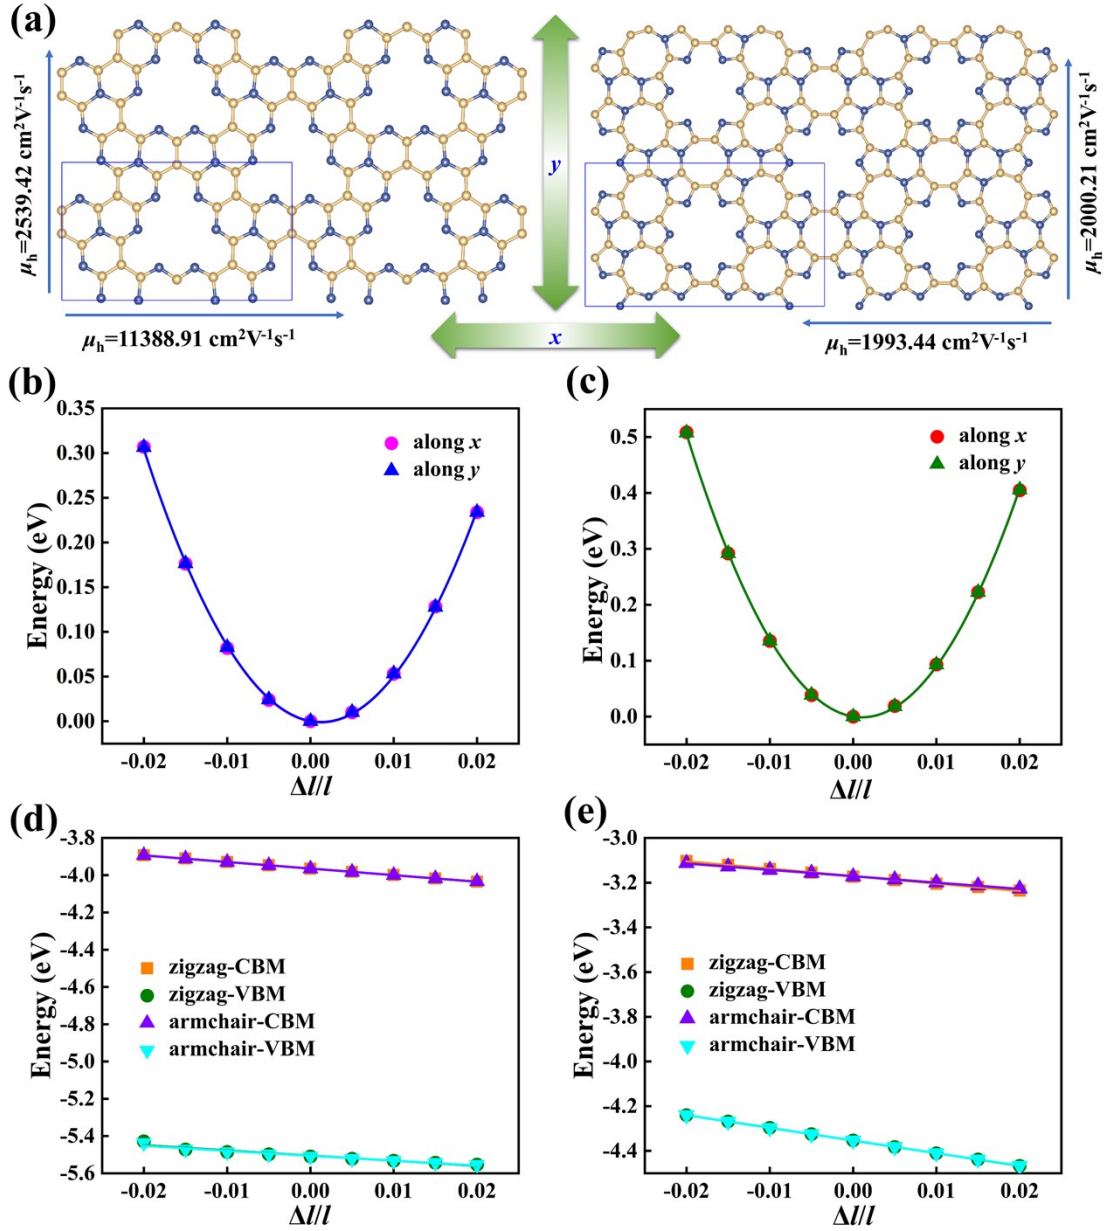

**Fig. S8** (a) The orthorhombic structures and hole mobilities of the P-C<sub>3</sub>N<sub>2</sub> and I-C<sub>3</sub>N<sub>2</sub> along the x and y directions. (b)-(c) Total energy shift  $E - E_0$  on the per surface as a function of lattice deformation  $\Delta/l$  along the x and y directions in P-C<sub>3</sub>N<sub>2</sub> and I-C<sub>3</sub>N<sub>2</sub>. (d)-(e) Relationship between energy shift of the band edge position and the dilation  $\Delta/l$ .

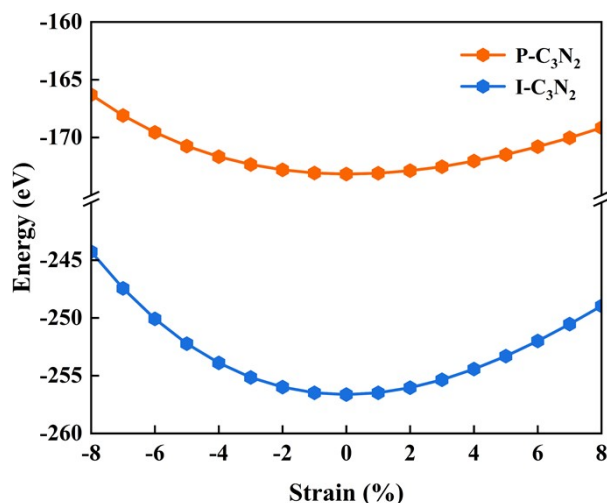

**Fig. S9** Energy-strain curves of  $C_3N_2$  monolayers under tensile and compression strains.

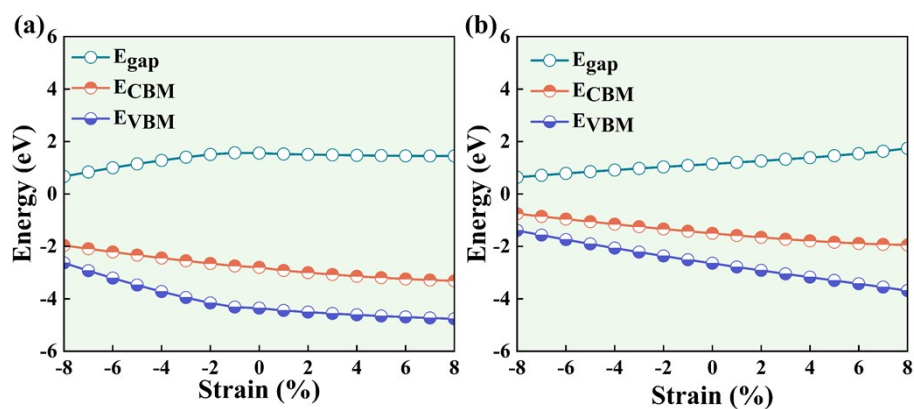

**Fig. S10** Variations of energy eigen values of the CBM and VBM and band gap as functions of the biaxial strain of (a)  $P-C_3N_2$  and (b)  $I-C_3N_2$ .

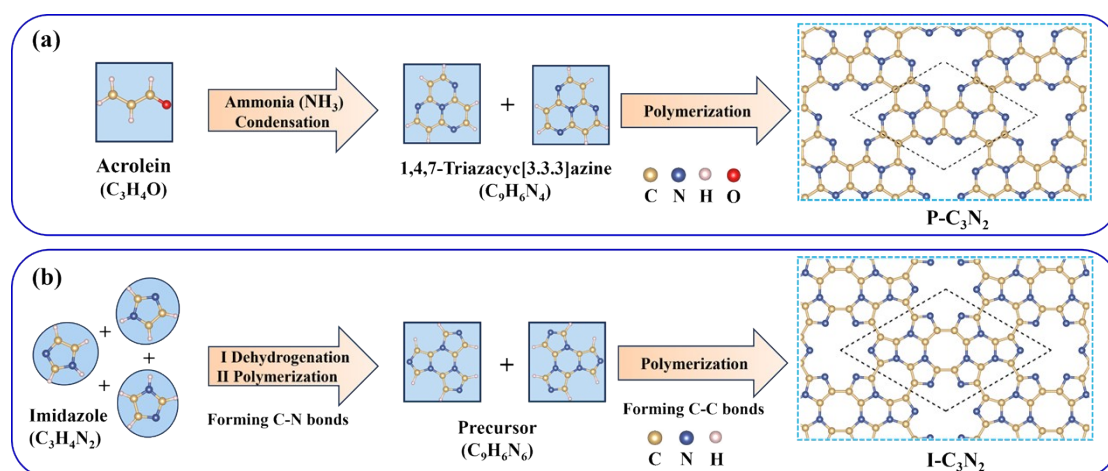

**Fig. S11** The schematic synthesis process of (a)  $P-C_3N_2$  and (b)  $I-C_3N_2$ .
